# Supplementary material
Source: PubMed Central journal article supplement (PMC2667286)
Supplement: ddp073_2.pdf [file ddp073_2.pdf]

**Supplementary Table 3. Results of the Family-based Association Analysis in 156 MS Families from the Southern Ostrobothnia**

| Gene            | SNP        | Location <sup>a</sup> | P-value <sup>b</sup> |
|-----------------|------------|-----------------------|----------------------|
| <i>C7</i>       | rs1901167  | 40996921              | 0.094                |
| <i>C7</i>       | rs324061   | 40999587              | 0.530                |
| <i>C7</i>       | rs13157656 | 41000609              | 0.122                |
| <i>C7</i>       | rs3805221  | 41001075              | 0.148                |
| <i>C7</i>       | rs3805226  | 41009762              | 0.056                |
| <i>C7</i>       | rs3828511  | 41012092              | 0.029                |
| <i>C7</i>       | rs6860438  | 41015419              | 0.006                |
| <i>C7</i>       | rs1055021  | 41015923              | 0.018                |
| Intergenic      | rs7732104  | 41019193              | 0.210                |
| Intergenic      | rs4957361  | 41021361              | 0.571                |
| Intergenic      | rs13161930 | 41021841              | 0.041                |
| Intergenic      | rs2122564  | 41023131              | 0.087                |
| Intergenic      | rs1376174  | 41023856              | 0.031                |
| Intergenic      | rs7736582  | 41027101              | 0.181                |
| <i>FLJ40243</i> | rs896117   | 41035176              | 0.061                |
| <i>FLJ40243</i> | rs1530812  | 41035909              | 0.029                |
| <i>FLJ40243</i> | rs3817324  | 41035949              | 0.008                |
| <i>FLJ40243</i> | rs2167229  | 41036780              | 0.019                |
| <i>FLJ40243</i> | rs16870603 | 41038515              | 0.497                |
| <i>FLJ40243</i> | rs7712140  | 41040153              | 0.511                |
| <i>FLJ40243</i> | rs2305314  | 41040564              | 0.079                |
| <i>FLJ40243</i> | rs1450658  | 41044999              | 0.756                |
| <i>FLJ40243</i> | rs1450659  | 41051060              | 0.918                |
| <i>FLJ40243</i> | rs10058056 | 41055699              | 0.331                |

<sup>a</sup> Location on Chromosome 5 according to UCSC Genome Browser, Mar 2006 freeze.

<sup>b</sup> Gamete Competition Association Results.
