# Supplementary material
Source: PubMed Central journal article supplement (PMC2667286)

Suppl. Figure 1.

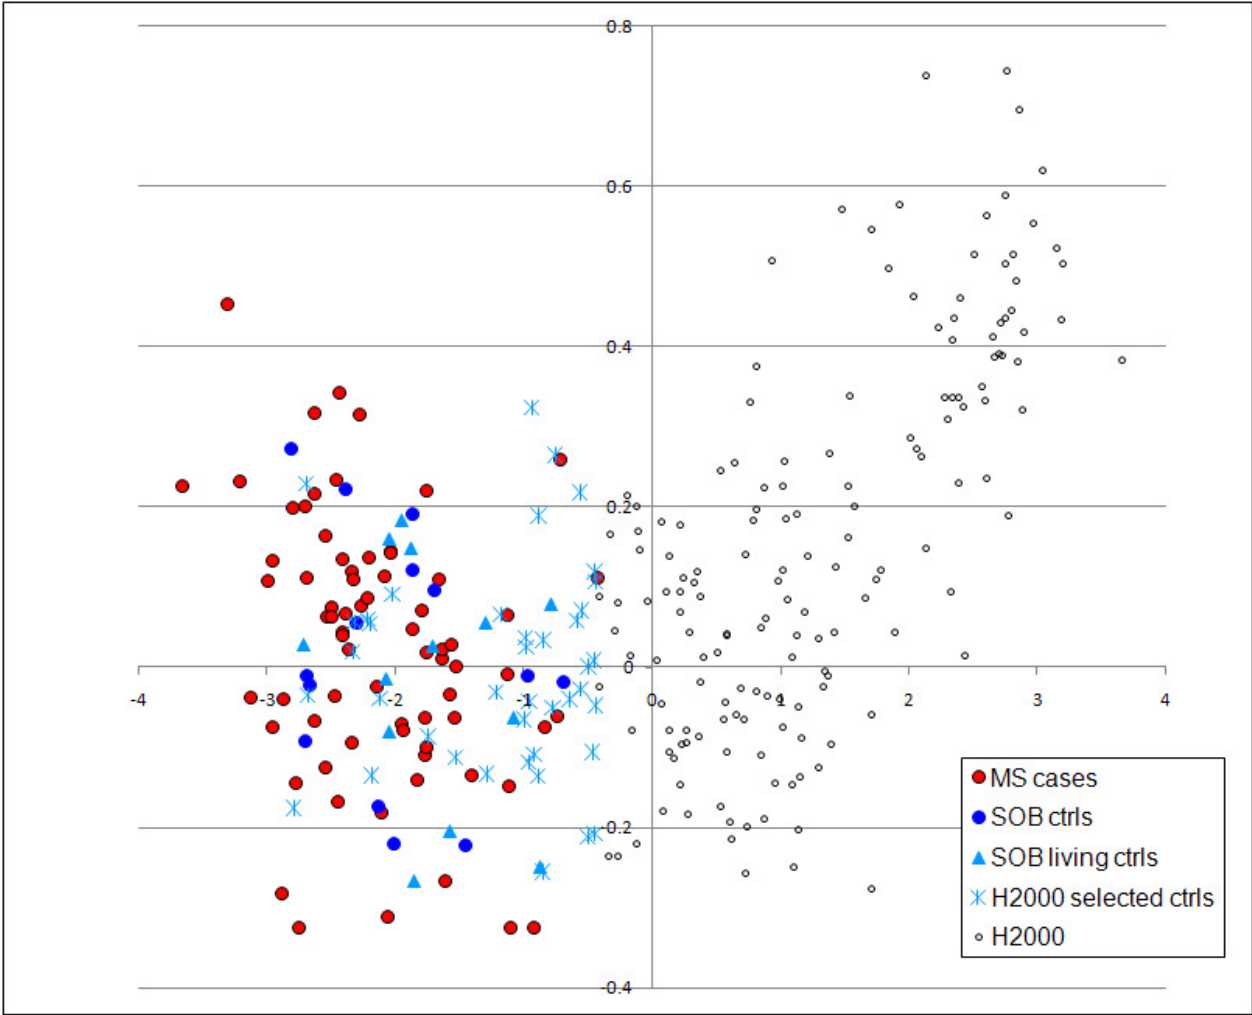

Supplement: ddp073_1.pdf [file ddp073_1.pdf]
